# Supplementary material
Source: PubMed Central journal article supplement (PMC4497536)
Supplement: NIHMS703303-supplement-Figure_S1.pdf [file NIHMS703303-supplement-Figure_S1.pdf]

**A**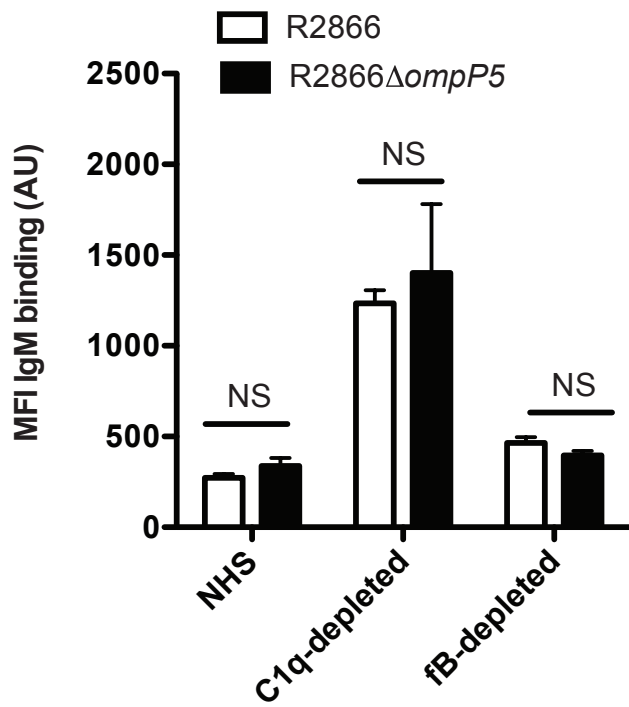**B**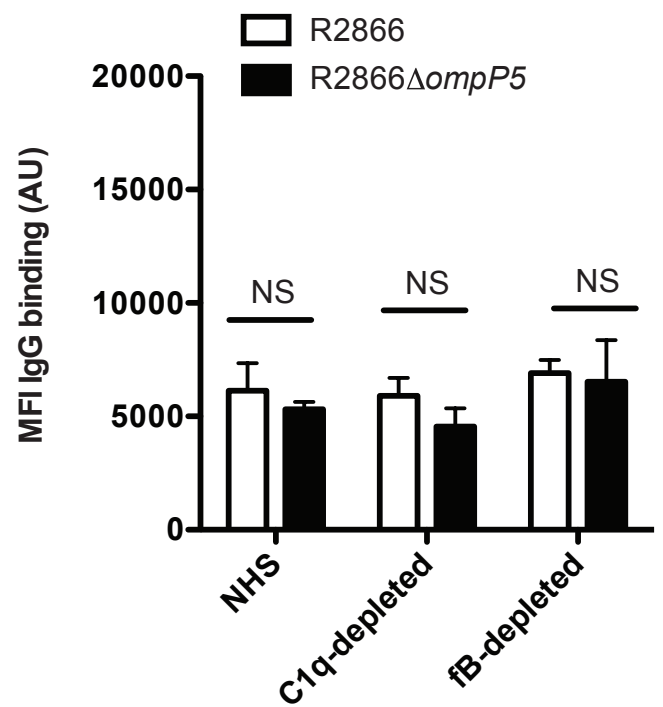

### Supplemental figure S1

**Binding of IgG and IgM from NHS, C1q-depleted NHS and fB-depleted NHS.** Binding of IgG (n=4) (A) or IgM (n=4) (B) to NTHi R2866 and R2866 $\Delta$ ompP5 mutant incubated for 15 minutes in 5% NHS, 5% C1q-depleted NHS or 5% fB-depleted NHS was determined by flow cytometry and compared by measurement of geometric mean fluorescence intensity (MFI) in arbitrary units (AU). Statistical significance was determined with an unpaired student *t* test. NS, not significant.
