# Supplementary material
Source: PubMed Central journal article supplement (PMC4497536)
Supplement: NIHMS703303-supplement-Figure_S2.pdf [file NIHMS703303-supplement-Figure_S2.pdf]

**A****Coomassie**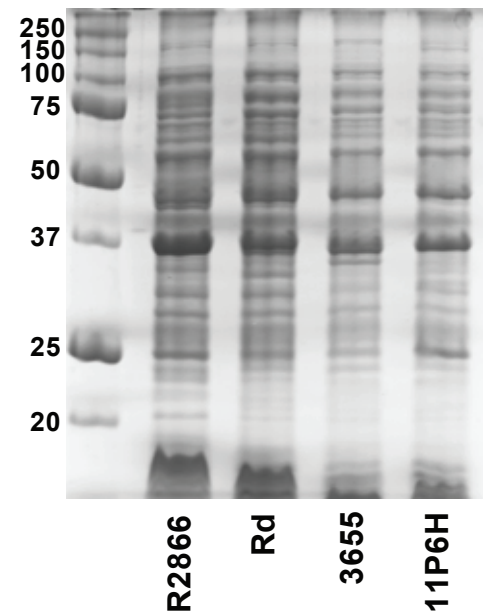**B** **$\alpha$ -OmpP5**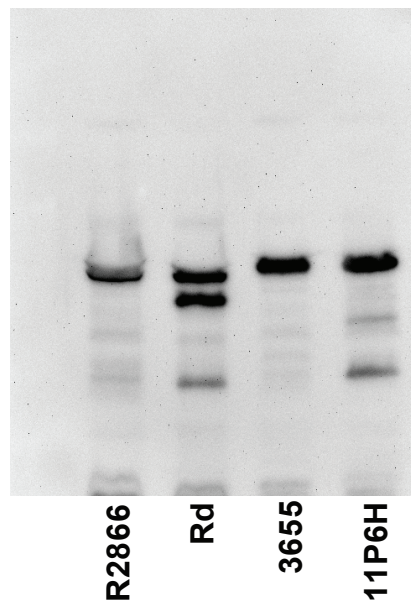**C**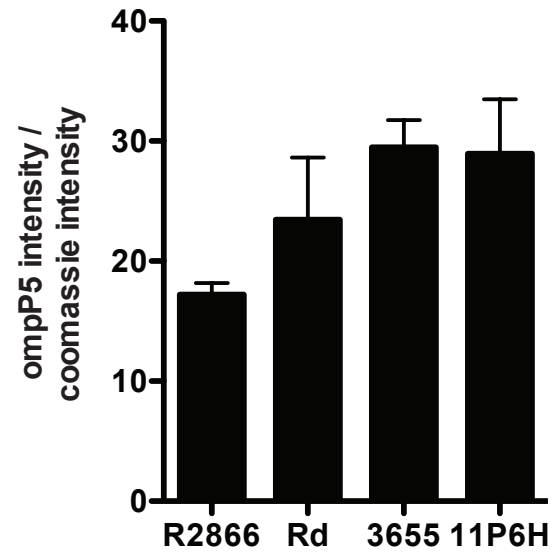**Supplemental figure S2****Outer membrane protein P5 expression by strains Rd, R2866, 3655, 11P6H.**

(A) Coomassie stain of whole cell lysates and (B) the presence of OmpP5 in NTHi strains Rd, R2866, 3655, 11P6H was detected by Western analysis with rabbit polyclonal  $\alpha$ -ompP5 serum. The molecular weight size marker is in kilodaltons (kDa). The two bands detected for Rd likely represents the unfolded and folded OmpP5 protein. (C) Densitometric analysis OmpP5 expression, average of three independent experiments.
