# Supplementary material
Source: PubMed Central journal article supplement (PMC4497536)
Supplement: NIHMS703303-supplement-Figure_S3.pdf [file NIHMS703303-supplement-Figure_S3.pdf]

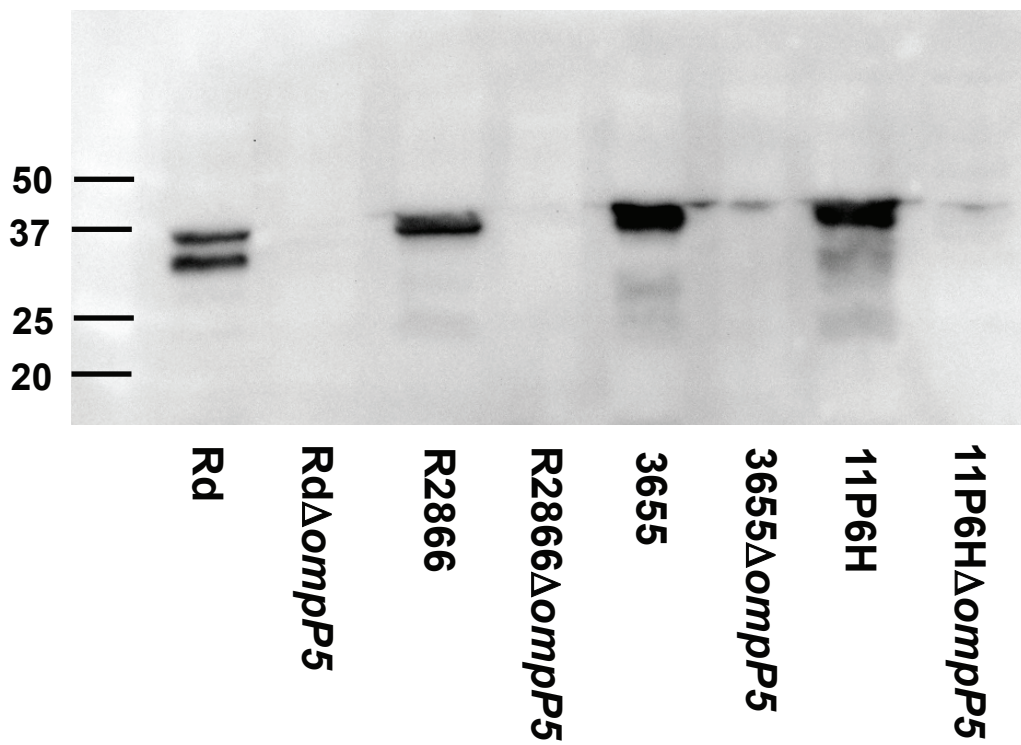

### Supplemental figure S3

**Outer membrane protein P5 expression by WT and  $\Delta$ ompP5 mutants of strains Rd, R2866, 3655, 11P6H.** The presence of OmpP5 in NTHi strains Rd, R2866, 3655, 11P6H WT and  $\Delta$ ompP5 mutants was detected by Western analysis with rabbit polyclonal  $\alpha$ -ompP5 serum. The molecular weight size marker is in kilodaltons (kDa). The two bands detected for Rd likely represents the unfolded and folded OmpP5 protein.
